# Supplementary material
Source: PubMed Central journal article supplement (PMC7008312)
Supplement: tpmd190490.SD1.pdf [file tpmd190490.SD1.pdf]

**Supplemental Table S1. Annual rates of *S. stercoralis* testing, by Indigenous status.**

| <b>Year</b> | <b>Tested</b> | <b>Indigenous</b> | <b>Non-Indigenous</b> | <b>Indigenous status not known</b> |
|-------------|---------------|-------------------|-----------------------|------------------------------------|
| 2000        | 69            | 58                | 7                     | 4                                  |
| 2001        | 159           | 136               | 15                    | 8                                  |
| 2002        | 123           | 96                | 18                    | 9                                  |
| 2003        | 65            | 57                | 8                     | 0                                  |
| 2004        | 65            | 53                | 11                    | 1                                  |
| 2005        | 88            | 72                | 14                    | 2                                  |
| 2006        | 145           | 118               | 23                    | 4                                  |
| 2007        | 63            | 44                | 17                    | 2                                  |
| 2008        | 74            | 53                | 20                    | 1                                  |
| 2009        | 136           | 97                | 36                    | 3                                  |
| 2010        | 153           | 100               | 48                    | 5                                  |
| 2011        | 188           | 148               | 33                    | 7                                  |
| 2012        | 69            | 37                | 29                    | 3                                  |
| 2013        | 84            | 56                | 25                    | 3                                  |
| 2014        | 95            | 56                | 35                    | 4                                  |
| 2015        | 133           | 56                | 77                    | 0                                  |
| 2016        | 352           | 242               | 109                   | 1                                  |
| 2017        | 146           | 65                | 80                    | 1                                  |
| 2018        | 222           | 105               | 116                   | 1                                  |
| Total       | 2429          | 1649              | 721                   | 59                                 |
