# Supplementary material
Source: PubMed Central journal article supplement (PMC7008312)
Supplement: tpmd190490.SD2.pdf [file tpmd190490.SD2.pdf]

## Supplemental Table S2. Checklist. STROBE Statement.

|                           | Item No | Recommendation                                                                                                                                                                       | Page Number                    |
|---------------------------|---------|--------------------------------------------------------------------------------------------------------------------------------------------------------------------------------------|--------------------------------|
| <b>Title and abstract</b> | 1       | (a) Indicate the study's design with a commonly used term in the title or the abstract                                                                                               | 2; Abstract, paragraph 2       |
|                           |         | (b) Provide in the abstract an informative and balanced summary of what was done and what was found                                                                                  | 2; Abstract, paragraph 2       |
| <b>Introduction</b>       |         |                                                                                                                                                                                      |                                |
| Background/rationale      | 2       | Explain the scientific background and rationale for the investigation being reported                                                                                                 | 6; Introduction, paragraph 6   |
| Objectives                | 3       | State specific objectives, including any prespecified hypotheses                                                                                                                     | 6; Introduction, paragraph 6   |
| <b>Methods</b>            |         |                                                                                                                                                                                      |                                |
| Study design              | 4       | Present key elements of study design early in the paper                                                                                                                              | 6; Methods, paragraphs 1 - 3   |
| Setting                   | 5       | Describe the setting, locations, and relevant dates, including periods of recruitment, exposure, follow-up, and data collection                                                      | 6; Methods, paragraphs 1, 2, 6 |
| Participants              | 6       | (a) Give the eligibility criteria, and the sources and methods of selection of participants. Describe methods of follow-up                                                           | 6; Methods, paragraph 2        |
|                           |         | (b) For matched studies, give matching criteria and number of exposed and unexposed                                                                                                  | N/A                            |
| Variables                 | 7       | Clearly define all outcomes, exposures, predictors, potential confounders, and effect modifiers. Give diagnostic criteria, if applicable                                             | 6; Methods, paragraph 2        |
| Data sources/measurement  | 8*      | For each variable of interest, give sources of data and details of methods of assessment (measurement). Describe comparability of assessment methods if there is more than one group | 6; Methods, paragraphs 2, 4, 5 |
| Bias                      | 9       | Describe any efforts to address potential sources of bias                                                                                                                            | 14; Discussion, paragraph 8    |
| Study size                | 10      | Explain how the study size was arrived at                                                                                                                                            | 8; Results, paragraph 1        |
| Quantitative variables    | 11      | Explain how quantitative variables were handled in the analyses. If applicable, describe which groupings were chosen and why                                                         | 7; Methods, paragraph 6        |
| Statistical methods       | 12      | (a) Describe all statistical methods, including those used to control for confounding                                                                                                | 7; Methods, paragraph 6        |
|                           |         | (b) Describe any methods used to examine subgroups and interactions                                                                                                                  | 7; Methods, paragraph 6        |
|                           |         | (c) Explain how missing data were addressed                                                                                                                                          | 8; Results, paragraph 1        |
|                           |         | (d) If applicable, explain how loss to follow-up was addressed                                                                                                                       | N/A                            |
|                           |         | (e) Describe any sensitivity analyses                                                                                                                                                | N/A                            |
| <b>Results</b>            |         |                                                                                                                                                                                      |                                |

|                          |     |                                                                                                                                                                                                              |                                  |
|--------------------------|-----|--------------------------------------------------------------------------------------------------------------------------------------------------------------------------------------------------------------|----------------------------------|
| Participants             | 13* | (a) Report numbers of individuals at each stage of study—eg numbers potentially eligible, examined for eligibility, confirmed eligible, included in the study, completing follow-up, and analysed            | 8; Results, paragraph 1          |
|                          |     | (b) Give reasons for non-participation at each stage                                                                                                                                                         | N/A                              |
|                          |     | (c) Consider use of a flow diagram                                                                                                                                                                           | N/A                              |
| Descriptive data         | 14* | (a) Give characteristics of study participants (eg demographic, clinical, social) and information on exposures and potential confounders                                                                     | 8; Results, paragraph 2          |
|                          |     | (b) Indicate number of participants with missing data for each variable of interest                                                                                                                          | 8; Results, paragraph 1          |
|                          |     | (c) Summarise follow-up time (eg, average and total amount)                                                                                                                                                  | N/A                              |
| Outcome data             | 15* | Report numbers of outcome events or summary measures over time                                                                                                                                               | 8; Results, paragraph 3          |
| Main results             | 16  | (a) Give unadjusted estimates and, if applicable, confounder-adjusted estimates and their precision (eg, 95% confidence interval). Make clear which confounders were adjusted for and why they were included | 8; Results, paragraph 3, 4, 5, 6 |
|                          |     | (b) Report category boundaries when continuous variables were categorized                                                                                                                                    | N/A                              |
|                          |     | (c) If relevant, consider translating estimates of relative risk into absolute risk for a meaningful time period                                                                                             | N/A                              |
| Other analyses           | 17  | Report other analyses done—eg analyses of subgroups and interactions, and sensitivity analyses                                                                                                               | 9; Results, paragraph 5, 6       |
| <b>Discussion</b>        |     |                                                                                                                                                                                                              |                                  |
| Key results              | 18  | Summarise key results with reference to study objectives                                                                                                                                                     | 11; Discussion, paragraph 1      |
| Limitations              | 19  | Discuss limitations of the study, taking into account sources of potential bias or imprecision. Discuss both direction and magnitude of any potential bias                                                   | 14; Discussion, paragraph 8      |
| Interpretation           | 20  | Give a cautious overall interpretation of results considering objectives, limitations, multiplicity of analyses, results from similar studies, and other relevant evidence                                   | 14; Conclusion, paragraph 1      |
| Generalisability         | 21  | Discuss the generalisability (external validity) of the study results                                                                                                                                        | 13; Discussion, paragraph 6      |
| <b>Other information</b> |     |                                                                                                                                                                                                              |                                  |
| Funding                  | 22  | Give the source of funding and the role of the funders for the present study and, if applicable, for the original study on which the present article is based                                                | N/A                              |

\*Give information separately for exposed and unexposed groups.
